# Supplementary material
Source: publisher figshare collection journal article supplement (https://frontiersin.figshare.com/ndownloader/files/17916197)
Supplement: Supplementary file [file 17916197]

Ty3/Copia-Tork

Ty3/Gypsy-Chromovirus

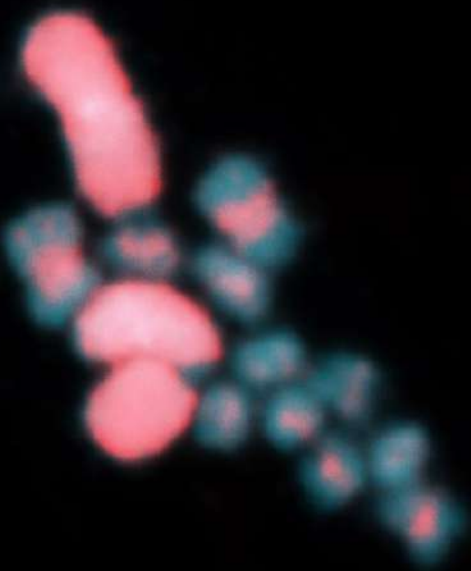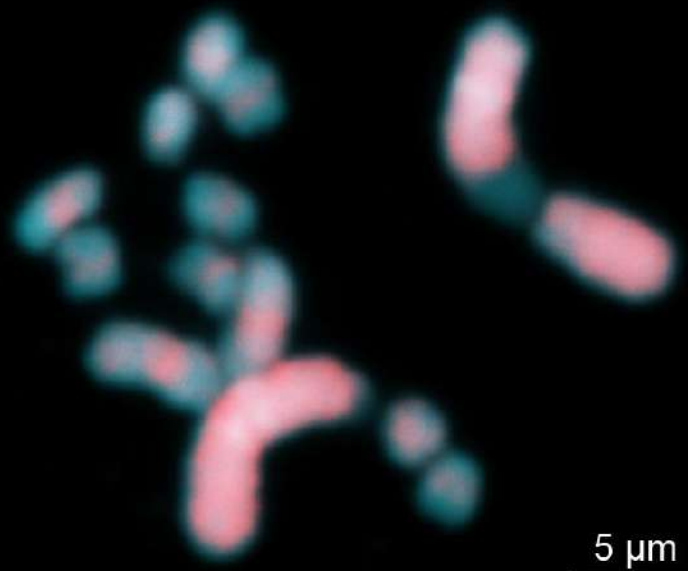

Figure S1. Distribution of LTR-retrotransposons Ty1/Copia-Tork and Ty3/Gypsy-Chromovirus elements in *E. bulbosa*. Both types of repeats are highly enriched along the large chromosome pair and the at the pericentromeric region in all small chromosomes.
